# Supplementary material for: Mass Spectrometry-Based Disulfide Mapping of Lysyl Oxidase-like 2
Source: MDPI journal article supplement (doi:10.3390/ijms23115879), 2022-05-24
Supplement: s1 [file s1]

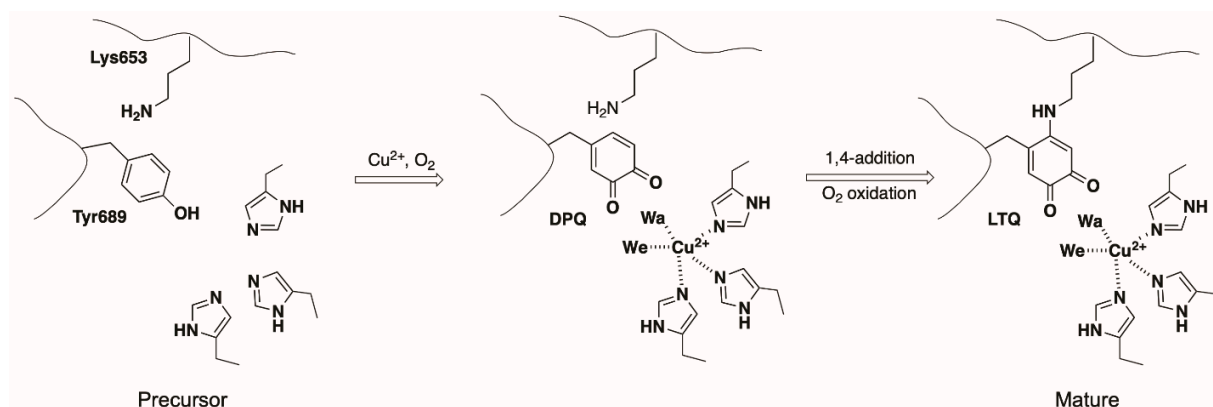

**Figure S1.** A plausible mechanism for the LTQ cofactor biogenesis from precursor residues (Lys653 and Tyr689). 1,4-Addition of  $\epsilon$ -amino group of Lys653 to C2 position of dopaquinone (DPQ) intermediate derived from Tyr689 and subsequent O<sub>2</sub> oxidation yield the LTQ cofactor. The precursor and mature LOXL2s correspond to prior and post LTQ biogenesis, respectively.

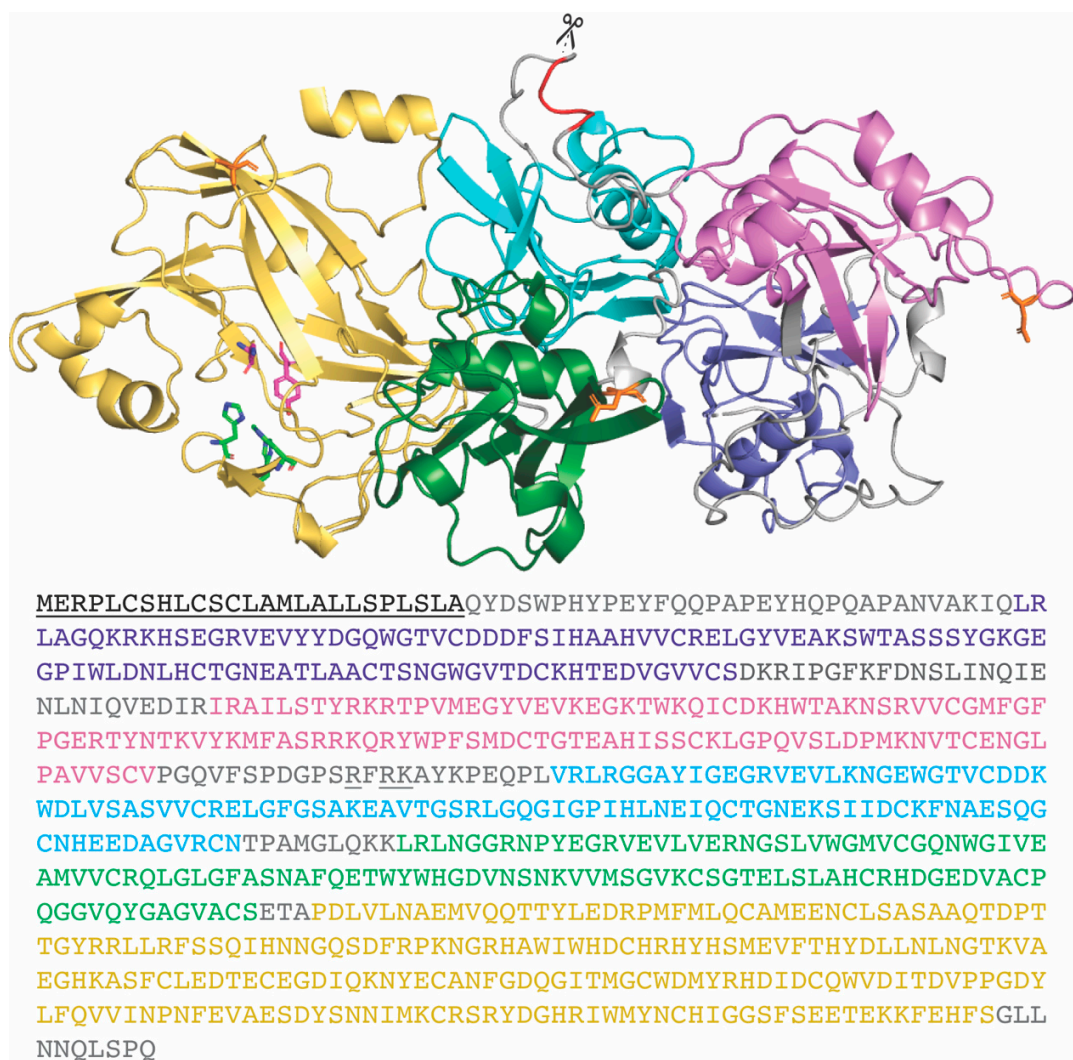

**Figure S2.** AlphaFold V2-predicted structure (precursor form) and amino acid sequence of fl-LOXL2 (<https://alphafold.ebi.ac.uk/entry/Q9Y4K0>). SRCR1: in slate; SRCR2: in light purple; SRCR3: in light blue; SRCR4: in deep green; C-terminal amine oxidase domain: in yellow. N-glycosylation sites (Asn288, Asn455, Asn644) are shown in orange. The Cu<sup>2+</sup>-binding site (His626-X-His628-X-His630) is in green. The precursor residues of the LTQ cofactor (Lys653 and Tyr689) are in magenta. The PACE4 recognition sequence in between SRCR2 and SRCR3 is in red and the cleavage site is indicated by a scissor. Underlined: signal peptide

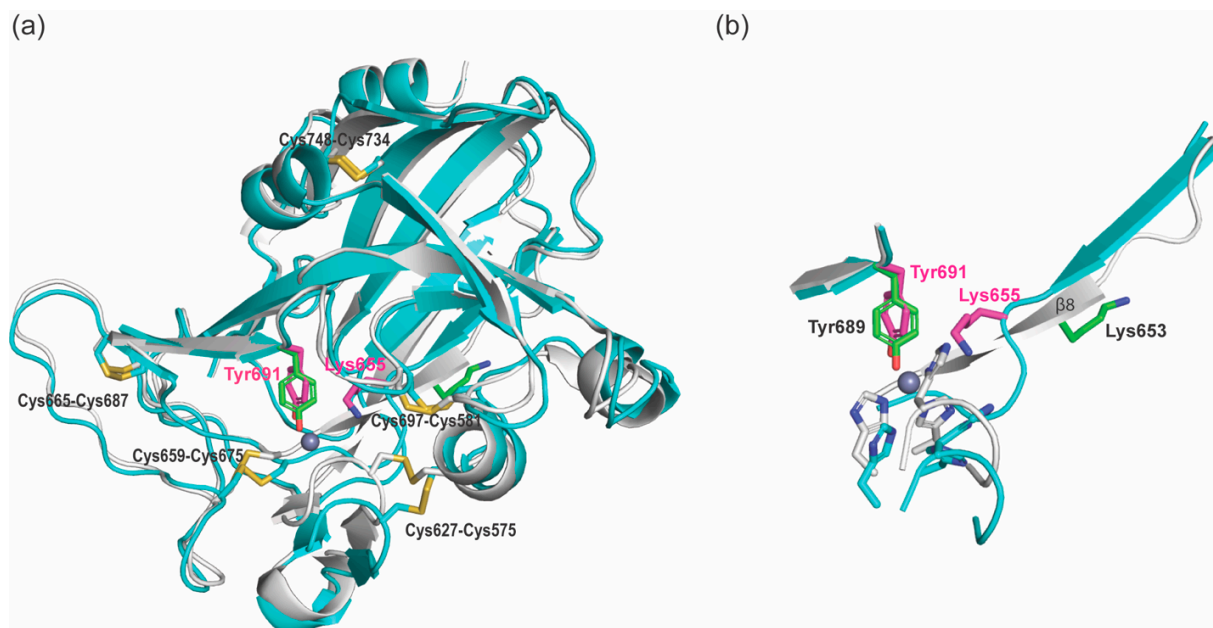

**Figure S3.** Comparison of active sites of Zn<sup>2+</sup>-bound precursor human LOXL2 (PDB:5ZE3, in white) and AlphaFold V2 – modeled mouse LOXL2 (<https://alphafold.ebi.ac.uk/entry/P58022>, in cyan). (a) Superimposition of the C-terminal amine oxidase domains (RMSD: 0.542). Precursor residues for the LTQ cofactor are Lys655 and Tyr 691 (in magenta) for mouse LOXL2 and Lys653 and Tyr 689 (in green) for human LOXL2. The set of five disulfide bonds (Cys575-Cys627, Cys581-Cys697, Cys659-Cys675, Cys665-Cys687, Cys734-Cys748, in yellow) in mouse LOXL2 is completely conserved with that (Table 1) in human LOXL2 (note: residue numbers in mouse LOXL2 are +2 to those in human LOXL2). Some conformational differences are observed for the disulfide bond, Cys575-Cys627, and the loop containing the His-X-His-X-His Cu<sup>2+</sup>-binding motif. (b) The major conformational/secondary structure differences are detected for Lys655 in mouse LOXL2 (in loop) versus human LOXL2 (in  $\beta$ 8). The position of  $\beta$ 8 in mouse LOXL2 has shifted towards N-term (e.g. Val650-His654) when compared to His652-Phe656 in human LOXL2.

**Table S1.** Mass spectrometry data for major disulfide bonds identified for the 2HP inhibited fl-LOXL2.

| Peptide (#) | Domain                     | Disulfide                           | Charge State    | Theoretical<br><i>m/z</i> | Experimental<br><i>m/z</i> | Mass Error<br>(ppm) |
|-------------|----------------------------|-------------------------------------|-----------------|---------------------------|----------------------------|---------------------|
| 1           | 1 <sup>st</sup> SRCR       | Cys84–Cys148                        | 2+              | 745.7924                  | 745.7931                   | 1                   |
|             |                            |                                     | 3+              | 497.5307                  | 497.5310                   | 1                   |
| 2           |                            | Cys97–Cys158                        | 2+              | 881.4166                  | 881.4169                   | 0.4                 |
|             |                            |                                     | 3+              | 587.9468                  | 587.9470                   | 0.4                 |
|             |                            |                                     | 4+              | 441.2119                  | 441.2119                   | 0                   |
| 3           |                            | Cys128–Cys138                       | 2+              | 876.3593                  | 876.3603                   | 1                   |
|             | 3+                         |                                     | 584.5753        | 584.5757                  | 1                          |                     |
| 4           | 2 <sup>nd</sup> SRCR       | Cys218–Cys291<br>+<br>Cys231–Cys301 | 3+              | 1543.7163                 | 1543.7160                  | 0.2                 |
|             |                            |                                     | 4+              | 1158.0390                 | 1158.0382                  | 1                   |
|             |                            |                                     | 5+              | 926.6327                  | 926.6339                   | 1                   |
|             |                            |                                     | 6+              | 772.3618                  | 772.3624                   | 1                   |
| 5           |                            | Cys265–Cys275                       | 2+              | 1080.9449                 | 1080.9446                  | 0.2                 |
|             |                            |                                     | 3+              | 720.9657                  | 720.9664                   | 1                   |
|             | 4+                         |                                     | 540.9761        | 540.9759                  | 0.3                        |                     |
| 6           | 3 <sup>rd</sup> SRCR       | Cys351–Cys414                       | 3+              | 1028.4212                 | 1028.4212                  | 0                   |
|             |                            |                                     | 4+              | 771.5677                  | 771.5677                   | 0                   |
|             |                            |                                     | 5+              | 617.4556                  | 617.4558                   | 0.3                 |
| 7           |                            | Cys364–Cys424                       | 2+              | 1147.5582                 | 1147.5565                  | 1                   |
|             |                            |                                     | 3+              | 765.3745                  | 765.3739                   | 1                   |
|             |                            |                                     | 4+              | 574.2827                  | 574.2820                   | 1                   |
| 8           |                            | Cys395–Cys405                       | 2+              | 1398.7045                 | 1398.7030                  | 1                   |
|             |                            |                                     | 3+              | 932.8056                  | 932.8048                   | 1                   |
|             |                            |                                     | 4+              | 699.8559                  | 699.8561                   | 0.3                 |
| 9           | 4 <sup>th</sup> SRCR       | Cys464–Cys530<br>+<br>Cys477–Cys543 | 5+              | 1449.0581                 | 1449.0600                  | 1                   |
|             |                            |                                     | 6+              | 1207.7163                 | 1207.7148                  | 1                   |
| 10          |                            | Cys511–Cys521                       | 2+              | 637.7845                  | 637.7845                   | 0                   |
|             |                            | 3+                                  | 425.5254        | 425.5252                  | 1                          |                     |
| 11          | Amine<br>oxidase<br>domain | Cys573–Cys625<br>+<br>Cys579–Cys695 | 7+              | 1309.5877                 | 1309.5887                  | 1                   |
|             |                            |                                     | 8+              | 1146.0151                 | 1146.0156                  | 0.4                 |
| 12a<br>12b  |                            | Cys657–Cys673<br>+<br>Cys663–Cys685 | 12a (precursor) |                           |                            |                     |
|             |                            |                                     | 3+              | 1419.5630                 | 1419.5626                  | 0.3                 |
|             |                            |                                     | 4+              | 1064.9241                 | 1062.9240                  | 0                   |
|             |                            |                                     | 5+              | 852.1407                  | 852.1400                   | 1                   |
|             |                            |                                     | 12b (mature)    |                           |                            |                     |
|             |                            |                                     | 4+              | 1246.0092                 | 1246.0069                  | 2                   |
| 5+          |                            |                                     | 997.0088        | 997.0083                  | 1                          |                     |
| 6+          |                            |                                     | 831.0086        | 831.0083                  | 0.3                        |                     |
| 13          |                            | Cys732–Cys746                       | 3+              | 802.6819                  | 802.6820                   | 0.1                 |
| 4+          |                            |                                     | 602.2632        | 602.2633                  | 0.1                        |                     |
| 5+          |                            |                                     | 482.0120        | 482.0118                  | 1                          |                     |

The peptide number (#) is from Table 3.

**Table S2.** Mass spectrometry data for major disulfide bonds identified for the precursor  $\Delta$ 1-2SRCR-LOXL2.

| Peptide (#) | Domain                     | Disulfide                           | Charge State | Theoretical<br><i>m/z</i> | Experimental<br><i>m/z</i> | Mass Error<br>(ppm) |
|-------------|----------------------------|-------------------------------------|--------------|---------------------------|----------------------------|---------------------|
| 6           | 3 <sup>rd</sup> SRCR       | Cys351–Cys414                       | 2+           | 1542.1281                 | 1542.1277                  | 0.3                 |
|             |                            |                                     | 3+           | 1028.4212                 | 1028.4215                  | 0.3                 |
|             |                            |                                     | 4+           | 771.5677                  | 771.5681                   | 1                   |
| 7           |                            | Cys364–Cys424                       | 2+           | 1147.5582                 | 1147.5585                  | 0.3                 |
|             |                            |                                     | 3+           | 765.3745                  | 765.3745                   | 1                   |
|             |                            |                                     | 4+           | 574.2827                  | 574.2831                   | 1                   |
| 8           |                            | Cys395–Cys405                       | 2+           | 1398.7045                 | 1398.7040                  | 0.4                 |
|             |                            |                                     | 3+           | 932.8056                  | 932.8052                   | 0.3                 |
|             |                            |                                     | 4+           | 699.8559                  | 699.8558                   | 0.2                 |
| 9           | 4 <sup>th</sup> SRCR       | Cys464–Cys530<br>+<br>Cys477–Cys543 | 5+           | 1449.0581                 | 1449.0586                  | 0.3                 |
|             |                            |                                     | 6+           | 1207.7163                 | 1207.7166                  | 0.3                 |
| 10          |                            | Cys511–Cys521                       | 2+           | 637.7845                  | 637.7838                   | 1                   |
|             |                            |                                     | 3+           | 425.5254                  | 425.5254                   | 0                   |
| 11          | Amine<br>oxidase<br>domain | Cys573–Cys625<br>+<br>Cys579–Cys695 | 6+           | 1527.6844                 | 1527.6853                  | 1                   |
|             |                            |                                     | 7+           | 1309.5877                 | 1309.5882                  | 0.4                 |
|             |                            |                                     | 8+           | 1146.0151                 | 1146.0147                  | 0.4                 |
|             |                            |                                     | 9+           | 1018.7920                 | 1018.7931                  | 1                   |
| 12a         |                            | Cys657–Cys673<br>+<br>Cys663–Cys685 | 3+           | 1419.5630                 | 1419.5633                  | 1                   |
|             |                            |                                     | 4+           | 1064.9241                 | 1064.9248                  | 1                   |
|             |                            |                                     | 5+           | 852.1407                  | 852.1406                   | 1                   |
| 13          |                            | Cys732–Cys746                       | 3+           | 802.6819                  | 802.6827                   | 1                   |
|             |                            |                                     | 4+           | 602.2632                  | 602.2637                   | 1                   |
|             |                            |                                     | 5+           | 482.0120                  | 482.0126                   | 1                   |

The peptide number (#) is from Table 3.

**Table S3.** Mass spectrometry data for major disulfide bonds identified for the mixture of  $\Delta 1$ -3SRCR-LOXL2. The peptide number (#) is from Table 3.

| Peptide (#) | Domain                  | Disulfide                           | Charge State         | Theoretical<br><i>m/z</i>                        | Experimental<br><i>m/z</i>                       | Mass Error<br>(ppm) |
|-------------|-------------------------|-------------------------------------|----------------------|--------------------------------------------------|--------------------------------------------------|---------------------|
| 9           | 4 <sup>th</sup> SRCR    | Cys464–Cys530<br>+                  | 5+<br>6+             | 1449.0581<br>1207.7163                           | 1449.0580<br>1207.7161                           | 0.1<br>0.2          |
| 10          |                         | Cys511–Cys521                       | 2+<br>3+             | 637.7845<br>425.5254                             | 637.7838<br>425.5254                             | 1<br>0              |
| 11          |                         | Cys573–Cys625<br>+<br>Cys579–Cys695 | 6+<br>7+<br>8+<br>9+ | 1527.6844<br>1309.5877<br>1146.0151<br>1018.7920 | 1527.6855<br>1309.5875<br>1146.0143<br>1018.7931 | 1<br>1<br>1<br>1    |
| 12a<br>12b  | Amine oxidase<br>domain | Cys657–Cys673<br>+<br>Cys663–Cys685 | 12a (precursor)      |                                                  |                                                  |                     |
|             |                         |                                     | 3+                   | 1419.5630                                        | 1419.5623                                        | 1                   |
|             |                         |                                     | 4+                   | 1064.9241                                        | 1062.9241                                        | 0                   |
|             |                         |                                     | 5+                   | 852.1407                                         | 852.1402                                         | 1                   |
|             |                         |                                     | 12b (mature)         |                                                  |                                                  |                     |
|             |                         |                                     | 4+                   | 1246.0092                                        | 1246.0078                                        | 1                   |
|             |                         |                                     | 5+                   | 997.0088                                         | 997.0094                                         | 1                   |
| 13          | Cys732–Cys746           | 6+                                  | 831.0086             | 831.0089                                         | 0.4                                              |                     |
|             |                         | 3+                                  | 802.6819             | 802.6813                                         | 1                                                |                     |
|             |                         | 4+                                  | 602.2632             | 602.2631                                         | 0.2                                              |                     |
|             |                         | 5+                                  | 482.0120             | 482.0118                                         | 1                                                |                     |

**Table S4.** Additional disulfide bonds detected for the mixture of  $\Delta 1$ -3SRCR-LOXL2.  
The peptide number (#) is from Table 5.

| Peptide (#) | Domain               | Disulfide               | Charge State  | Theoretical<br><i>m/z</i> | Experimental<br><i>m/z</i> | Mass Error<br>(ppm) |
|-------------|----------------------|-------------------------|---------------|---------------------------|----------------------------|---------------------|
| 14          | 4 <sup>th</sup> SRCR | Cys464–Cys477           | 2+            | 1304.1025                 | 1304.1008                  | 1                   |
|             |                      |                         | 3+            | 869.7374                  | 869.7384                   | 1                   |
|             |                      |                         | 4+            | 652.5549                  | 652.5540                   | 1                   |
| 15          |                      | Cys530–Cys543           | 3+            | 1545.6952                 | 1545.6944                  | 1                   |
|             |                      |                         | 4+            | 1159.5232                 | 1159.5220                  | 1                   |
| 16          |                      | Amine oxidase<br>domain | Cys573–Cys579 | 2+                        | 1532.6526                  | 1532.6521           |
|             | 3+                   |                         |               | 1022.1042                 | 1022.1043                  | 0.1                 |
|             | 4+                   |                         |               | 766.8299                  | 766.8294                   | 1                   |
| 17          | Cys625–Cys695        |                         | 5+            | 1220.3617                 | 1220.3634                  | 1                   |
|             |                      |                         | 6+            | 1017.1360                 | 1017.1356                  | 0.4                 |
|             |                      |                         | 7+            | 871.9747                  | 871.9741                   | 1                   |
| 18          | Cys657–Cys663        |                         | 2+            | 893.3689                  | 893.3687                   | 0.2                 |
|             |                      |                         | 3+            | 595.9150                  | 595.9149                   | 0.2                 |
| 19          | Cys673–Cys685        |                         | 2+            | 1236.4792                 | 1236.4782                  | 1                   |
|             |                      |                         | 3+            | 824.6552                  | 824.6559                   | 1                   |
|             |                      |                         | 4+            | 618.7432                  | 618.7426                   | 1                   |

**Table S5.** Additional disulfide bonds detected for the precursor  $\Delta 1$ -2SRCR-LOXL2.  
The peptide number (#) is from Table 5.

| Peptide (#) | Domain                  | Disulfide                  | Charge State | Theoretical<br><i>m/z</i> | Experimental<br><i>m/z</i> | Mass Error<br>(ppm) |
|-------------|-------------------------|----------------------------|--------------|---------------------------|----------------------------|---------------------|
| 14          | 4 <sup>th</sup> SRCR    | Cys464–Cys477 <sup>1</sup> | 3+           | 869.7374                  | 869.7377                   | 0.4                 |
| 16          | Amine oxidase<br>domain | Cys573–Cys579              | 3+           | 1022.1042                 | 1022.1038                  | 0.4                 |
| 4+          |                         |                            | 766.8299     | 766.8304                  | 1                          |                     |
| 18          |                         | Cys657–Cys663              | 2+           | 893.3689                  | 893.3691                   | 0.1                 |
|             |                         |                            | 3+           | 595.9150                  | 595.9154                   | 1                   |
| 19          | Cys673–Cys685           | 2+                         | 1236.4792    | 1236.4793                 | 0.1                        |                     |
|             |                         | 3+                         | 824.6552     | 824.6553                  | 0.1                        |                     |

<sup>1</sup> Only one charge state but not the other peptide linked to this peptide was detected due to the low abundance.

**Table S6.** Additional disulfide bonds detected for the 2HP-inhibited fl-LOXL2.  
The peptide number (#) is from Table 5.

| Peptide (#) | Domain                  | Disulfide                  | Charge State | Theoretical<br><i>m/z</i> | Experimental<br><i>m/z</i> | Mass Error<br>(ppm) |
|-------------|-------------------------|----------------------------|--------------|---------------------------|----------------------------|---------------------|
| 14          | 4 <sup>th</sup> SRCR    | Cys464–Cys477 <sup>1</sup> | 3+           | 869.7374                  | 869.7381                   | 1                   |
| 18          | Amine oxidase<br>domain | Cys657–Cys663              | 2+           | 893.3689                  | 893.3685                   | 0.4                 |
| 3+          |                         |                            | 595.9150     | 595.9150                  | 0                          |                     |
| 19          |                         | Cys673–Cys685              | 2+           | 1236.4792                 | 1236.4782                  | 1                   |
|             |                         |                            | 3+           | 824.6552                  | 824.6553                   | 0.1                 |

<sup>1</sup> Only one charge state but not the other peptide linked to this peptide was detected due to the low abundance.
